## Minireview

### Leptin in Pregnancy: An Update<sup>1</sup>

Michael C. Henson<sup>2,3,4,5,6</sup> and V. Daniel Castracane<sup>7</sup>

Departments of Obstetrics and Gynecology,<sup>3</sup> Physiology,<sup>4</sup> and Structural and Cellular Biology,<sup>5</sup> and the Tulane National Primate Research Center,<sup>6</sup> Tulane University Health Sciences Center, New Orleans, Louisiana 70112-2699  
Foundation for Blood Research,<sup>7</sup> Scarborough, Maine 04070-0190

#### ABSTRACT

Leptin influences satiety, adiposity, and metabolism and is associated with mechanisms regulating puberty onset, fertility, and pregnancy in various species. Maternal hyperleptinemia is a hallmark of mammalian pregnancy, although both the roles of leptin and the mechanisms regulating its synthesis appear to be taxa specific. In pregnant humans and nonhuman primates, leptin is produced by both maternal and fetal adipose tissues, as well as by the placental trophoblast. Specific receptors in the uterine endometrium, trophoblast, and fetus facilitate direct effects of the polypeptide on implantation, placental endocrine function, and conceptus development. A soluble isoform of the receptor may be responsible for inducing maternal leptin resistance during pregnancy and/or may facilitate the transplacental passage of leptin for the purpose of directly regulating fetal development. The steroid hormones are linked to the regulation of leptin and the leptin receptor and probably interact with other pregnancy-specific, serum-borne factors to regulate leptin dynamics during pregnancy. In addition to its effects on normal conceptus development, leptin is linked to mechanisms affecting a diverse array of pregnancy-specific pathologies that include preeclampsia, gestational diabetes, and intrauterine growth restriction. Association with these anomalies and with mechanisms pointing to a fetal origin for a range of conditions affecting the individual's health in adult life, such as obesity, diabetes mellitus, and cardiovascular disease, reiterate the need for continued research dedicated to elucidating leptin's roles and regulation throughout gestation.

*conceptus, leptin, leptin receptor, placenta, pregnancy*

#### INTRODUCTION

Leptin is the hormone product of the *LEP* gene and was originally thought to be produced only by adipocytes to aid in modulating satiety and energy homeostasis [1, 2]. However, the polypeptide is now known to be produced in many tissues and enhanced levels are associated with the advent of

reproductive maturity and fertility [3, 4]. Regulatory mechanisms are linked to gender, as women of reproductive age exhibit higher serum concentrations than comparably aged men. Similarly, levels in female fetuses [5, 6] and neonates [7, 8] are higher than in their male counterparts and levels in premenopausal women may be greater than those following menopause [as reviewed, 9–11]. Leptin functions via a specific receptor that is a member of the class I cytokine receptor superfamily and is manifested in alternatively spliced isoforms that are distinguished by the relative lengths of their cytoplasmic regions. These include a long form ( $LEPR_L$ ) that predominates in the hypothalamus, and a short form ( $LEPR_S$ ) that is found in many organs and tissues.  $LEPR_L$  exhibits consensus amino acid sequences involved in binding to Janus tyrosine kinases (JAK/STAT), while  $LEPR_S$  has distinct signaling capabilities involving mitogen-activated protein kinase (MAPK) [12]. A soluble, circulating leptin receptor (solLEPR) is generated in humans by the proteolytic cleavage of membrane-bound receptors [13]. Mice [14] and rats [15] manifest their own version of the circulating receptor ( $LEPR_E$ ), which is specifically expressed in copious amounts in the placenta. In pregnancy, as in some forms of obesity, “leptin resistance” may result from inhibited transport across the blood-brain barrier [16] or sequestration of bioactive leptin in the circulation by a soluble receptor [17, 18].

#### *Leptin/Leptin Receptor Ontogeny in Pregnancy*

Because of the wealth of research published over the last decade concerning its importance during pregnancy, we will focus primarily on the years following our last minireview of the subject [9]. As previously documented [9–11, 19–21], serum leptin concentrations are elevated throughout human pregnancy. Increases in the first trimester, before any perceptible increase in body weight due to progressive gestation, imply that factors other than increased adiposity modulate levels. Leptin concentrations rise along with estrogen and are correlated in early pregnancy with those of hCG. Fetal adipose tissue produces leptin [22], although the decline in neonatal levels following birth may denote the placenta's role as an important contributor to fetal concentrations [23]. The presence of leptin mRNA transcripts in the placental syncytiotrophoblast initially lead to the contention that the increase in maternal levels with advancing gestation might originate there [24]. In this regard, we have reported that transcripts for *LEP*, as well as for  $LEPR_L$  and  $LEPR_S$  leptin receptor isoforms, were expressed both early (7–14 wk) in gestation and at term, and in situ hybridization localized them in the endocrinologically active trophoblast [25]. The logical

<sup>1</sup>Supported by NIH P51 RR00164 and the Tulane National Primate Research Center.

<sup>2</sup>Correspondence: Michael C. Henson, Department of Obstetrics and Gynecology, Tulane University Health Sciences Center, 1430 Tulane Ave., New Orleans, Louisiana 70112-2699. FAX: 504 988 1846; e-mail: michaelchenson@bellsouth.net

Received: 22 July 2005.

First decision: 16 August 2005.

Accepted: 26 October 2005.

© 2006 by the Society for the Study of Reproduction, Inc.

ISSN: 0006-3363. <http://www.biolreprod.org>

presumption of a placental contribution to maternal hyperleptinemia can also be traced to two other observations. The first is the postpartum decline in leptin levels typically observed after the placenta is delivered, although the decline in leptin is relatively prolonged for a hormone with such a short half-life. The second results from the findings of placental perfusion studies. In contrast, however, we have examined (unpublished results) the role of placental mass in the rat by adjusting the number of fetal-placental units shortly after implantation, so that pregnant rats had 1–2, 4–5, or >10 implantation sites. Maternal serum leptin levels were highest in animals with fewer implantations and, conversely, were least in those with the greatest number of implantations. We also compared maternal serum leptin concentrations in women (15–20 wk of gestation) with singleton or twin pregnancies, and mean leptin levels and leptin levels plotted against BMI were virtually identical for both groups. Serial samples from singleton, twin, and triplet pregnancies demonstrated that placental number was not related to maternal serum leptin levels but rather that maternal adiposity was the controlling factor. These ongoing studies, as well as our work in nonhuman primates [as reviewed, 10, 11], suggest that increases in maternal leptin levels are not directly related to increases in placental mass, implying rather that the hormonal milieu of pregnancy upregulates the synthesis of leptin by maternal adipose tissue.

Leptin/leptin-receptor regulation and function in rodent pregnancy [26–28] differ significantly from that during pregnancy in both humans [25] and nonhuman primates [29–31]. Thus, although maternal peripheral leptin concentrations increase with gestational age in the human, *LEP* mRNA in placental villous tissue is greater in the first trimester than at term [25]. In contrast, Amico et al. [32] reported that, in the rat, placental *Lep* mRNA increased 4- to 5-fold over the final one third of pregnancy, while Garcia et al. [33] observed that *Lep* mRNA in placenta increased in abundance throughout gestation. In the mouse, although leptin transcripts may be expressed in both the placenta and fetus [34], the polypeptide does not appear to exert any physiological effects in either. Indeed, there is some disagreement as to whether the mouse placenta produces any leptin at all [35]. Consequently, Zhao et al. [36] concluded that the regulation of leptin in pregnancy is taxa specific and, although representatives of three orders (Chiroptera, Rodentia, Primate) exhibit pregnancy-associated hyperleptinemia, they accomplish it by different mechanisms. The highly conserved nature of this trait indicates, however, that leptin plays fundamental physiological roles in mammalian pregnancy.

To better understand the mechanisms regulating leptin dynamics in human pregnancy, we have employed a well-characterized nonhuman primate model, the baboon (*Papio* sp.), an Old World primate [37–39] that differs in some respects from New World monkeys [30] with regard to leptin production. In this species, leptin concentrations in pregnant animals are much higher than in either cycling or postpartum baboons and increase approximately 2.5-fold between days 60 and 160 of gestation [29]. Normal term in the baboon is approximately 184 days. As in humans, leptin transcripts in placental villous tissue decline between early and late gestation, but maternal serum leptin levels increase almost 3-fold with pregnancy and are correlated with advancing gestational age. Because the presence of both leptin and its receptor in the placenta [24, 25], amnion, chorion, and umbilical vasculature [40] suggest important roles in human pregnancy, we assessed these tissues, as well as omental and subcutaneous fat at early (Day 60), mid (Day 100), and late

(Day 160) baboon pregnancy [41]. A resurgent corpus luteum and decidual tissue were also collected on Day 160, as was fetal brain (hypothalamic region). Expression of *LEPR<sub>L</sub>* and *LEPR<sub>S</sub>* mRNA transcripts were detected by RT-PCR in all tissues, using human leptin receptor primers. Transcripts for both isoforms were constitutively expressed throughout gestation in placenta and adipose tissue, with the short form expressed in greater abundance than the long form in all tissues examined. This agrees with prior reports that *LEPR<sub>L</sub>* transcripts typically occur in lesser abundance in peripheral tissues than those encoding short intracellular domain forms [12]. As in humans [25], *in situ* hybridization localized transcripts for leptin and both receptor isoforms in baboon trophoblast. Expression intensity for leptin was greatest in early pregnancy, which mirrored the enhanced abundance of *LEP* transcripts at that time [29].

Increases in maternal serum leptin levels with advancing gestation has always presented a conceptual problem for those attempting to explain the rise in a perceived satiety factor during gestation, a period of increased nutritional demand. Although there is some disagreement as to whether soluble leptin receptor concentrations increase [42] or remain the same [43] with pregnancy in women, we have advocated that an increase in the amount of a soluble isoform of the leptin receptor and, hence, the level of bound/complexed leptin in the maternal circulation increases with advancing gestational age [9–11]. This increase would serve to reduce the availability of the hormone to hypothalamic receptors and prevent any inhibitory influence on food intake during this developmental period. In the human, at least two soluble leptin receptor isoforms bind leptin and perhaps potentiate leptin resistance [44, 45], with an increase in this protein having been proposed to explain the enhancement in maternal leptin typical during mammalian pregnancy [46]. A report by Schulz et al. [47] identified two isoforms of the leptin receptor in human placenta that are similar in size to those we have identified in the baboon [48]. Collectively, results associate pregnancy-specific tissues with the production of leptin receptor and suggest that increasing receptor concentrations could play a role in regulating leptin availability in primates.

### *Roles of Leptin in Pregnancy*

Many physiological roles have been suggested for leptin in human pregnancy [9–11, 19–21]. As in the corpus luteum of luteal-dependent species [49, 50], both leptin and leptin receptors have been identified in the placental syncytiotrophoblast, which suggests the potential for autocrine and paracrine mechanisms in a tissue that produces hormones necessary for the maintenance of primate pregnancy [37, 51]. Cultured cytotrophoblast cells produced leptin and the addition of recombinant leptin enhanced hCG release [52]. Leptin also stimulated hCG secretion by human placental explants and was responsible for both the induction of hCG pulses and enhancement of their amplitude [53]. A recent report indicated that leptin also activated the release of proinflammatory cytokines and prostaglandins from human placental explants, further implicating leptin as a modulator of placental endocrine function [54]. Intriguingly, the expression of leptin and leptin receptor in human placenta [55] and uterine endometrium [56] and the observation that endometrial leptin secretion is enhanced in the presence of a viable blastocyst link the polypeptide to early conceptus development [57, 58] and suggest its place among the array of regulators active during the apposition and adhesion phases of implantation [59–62]. Recent work also suggests that leptin augments the oocyte's

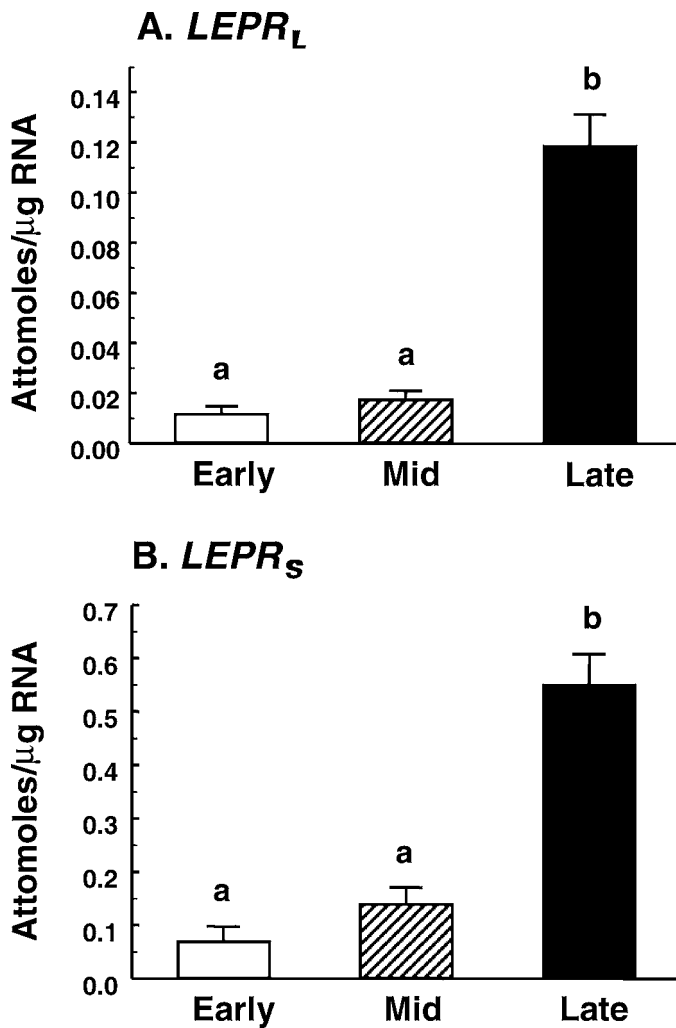

FIG. 1.  $LEPR_L$  (A) and  $LEPR_S$  (B) mRNA transcript abundance, as determined by competitive RT-PCR in fetal lung tissues collected in early ( $n = 4$  fetuses), mid ( $n = 4$  fetuses), and late ( $n = 4$  fetuses) baboon pregnancy. Different lowercase letters indicate significant differences between means  $\pm$  SEM (ab,  $P < 0.01$ ). As adapted from Henson et al. [100] by permission of the Society for Reproduction and Fertility.

ability to sustain embryonic development and potentiates a downregulation of apoptosis in the early blastocyst [63]. Because leptin receptor is expressed in maternal decidua and the uterine endometrium is identified as a target for leptin action, a definitive role is suggested in the blastocyst-endometrial dialogue [64–67]. In this capacity, the obligatory nature of leptin signaling in mammalian implantation [68] was illustrated by experiments in the mouse that demonstrated that endometrial leptin receptor expression was pregnancy dependent and that intrauterine injection of a leptin peptide antagonist or a leptin antibody impaired implantation. To this end, leptin enhances the invasiveness of mouse trophoblast cells in vitro via the upregulation of matrix metalloproteinases and may thereby play its role in early placental development [69]. Because the expression of leptin mRNA was increased severalfold in bovine placentomes from conceptuses produced by nuclear transfer, it was proposed that this effect could account for the increased fetal/placental macrosomia noted in conceptuses produced by this technique and be owed to aberrations in cell migration and invasion [70].

In addition to its relationship with early embryonic development and implantation, leptin has been linked to the

regulation of fetal growth, as concentrations of the polypeptide in umbilical cord blood were highly correlated with birth and placental weights [71, 72], an effect that was unrelated to the influences of other growth regulators [72–75]. Levels were also correlated with infant length [7, 75] and head circumference [75], and postnatal leptin administration restored the depressed brain weights of leptin-deficient  $Lep^{ob}/Lep^{ob}$  neonates [71, 76]. Interestingly, Smith and Waddell [77] proposed that, in the rat, a soluble form of the leptin receptor may actually serve as the physiological vehicle responsible for the transplacental movement of leptin into the fetal circulation for the purpose of modulating fetal growth. This same investigational team recently expanded its original observations in rodents to examine similar mechanisms in a human BeWo choriocarcinoma cell model [78]. The results of these experiments strongly suggested a potential for maternal-fetal leptin exchange across the human placenta, as well.

Because umbilical leptin concentrations have been associated with whole-body mineral content [79], the polypeptide has been proposed to directly stimulate fetal bone growth [80]. This effect could be potentiated via changes in the rates of osteoblast/osteoclast growth and differentiation [81, 82] or by the inhibition of bone resorption, resulting in a net increase in bone mass [83]. The ability of adipocyte-derived leptin to regulate osteogenic cells was also noted by Morroni et al. [84], who reported that growing rat bone expresses leptin in chondrocytes and stromal cells that may interact in a paracrine manner with specific receptors on osteogenic cells. Prior work had also suggested that leptin not only acted on human marrow stromal cells to enhance differentiation into osteoblasts and inhibit differentiation into adipocytes, but influenced endochondral ossification by regulating angiogenesis [85]. This angiogenic role has been demonstrated in various developmental models [86, 87]. With respect to the means by which it could facilitate angiogenesis in pregnancy, the polypeptide was reported to enhance vascular endothelial growth factor synthesis in cultured human cytotrophoblast cells [88].

Leptin may also be associated with pulmonary development in utero. In this capacity, insufficient maturation of the fetal lungs is a condition that can be characterized by inadequate production of pulmonary surfactant by epithelial type II cells. Increasing cortisol at term prompts the differentiation of type II cells and surfactant synthesis [89], although in preterm infants, surfactant levels are insufficient and pulmonary insults lead to acute lung injury and, potentially, chronic lung disease. Torday et al. [90] observed that leptin was expressed by fibroblasts and that leptin receptor was expressed in fetal rat lung type II cells. Subsequent experiments indicated that leptin plays a direct role in enhancing surfactant production in this species [91]. Recent investigations suggested the need to identify and characterize the array of growth factors potentially affecting pulmonary development [92]. Therefore, although it is well accepted that the maturation of type II cells is modulated by a number of soluble, low molecular-weight peptides, the identity of a specific fibroblast pneumocyte factor (FPF) remains elusive. This putative protein regulator promotes surfactant production and is downregulated by androgens [90], similarities that exist between it and leptin. In this respect, lung development in male fetuses is somewhat delayed when compared with females in many species, a phenomenon that reflects an inhibition by androgens [93]. This effect is mirrored by the inhibition of leptin biosynthesis by androgens, a phenomenon that is linked to gender [94, 95]. Other regulatory parallels include the effects of glucocorticoids, which, in addition to upregulating the putative FPF in the lung [89], increase leptin production by human adipocytes [96] and enhance leptin levels in preterm



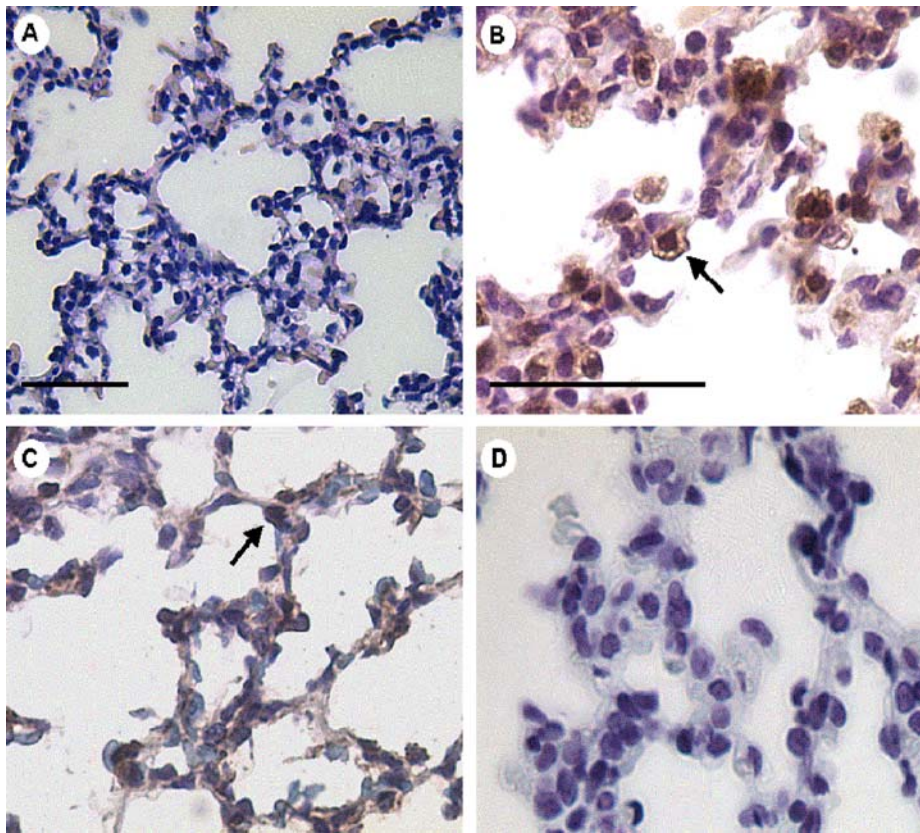

FIG. 2. Photomicrographs of lung tissue from fetal baboons in late gestation depicting the results of hematoxylin-eosin staining (A), and immunohistochemical localization of surfactant protein A (B), or LEPR (C) protein in pulmonary epithelial cells. A negative (D) (without primary antibody) immunohistochemical control for LEPR is included. Arrows denote pulmonary type II cells. Original magnification: A  $\times 200$ ; B–D  $\times 400$ . Bars = 50  $\mu\text{m}$ . Originally published in Henson et al. [100] and reproduced by permission of the Society for Reproduction and Fertility.

infants [97]. Moreover, leptin release was enhanced in human placental trophoblast cells by glucocorticoids [55] and maternal glucocorticoid treatment upregulated placental leptin receptor in rat pregnancy [98]. Therefore, with respect to commonalities with the proposed FPF [91, 99], leptin might be considered a logical FPF candidate [90]. We subsequently reported [100] that, in late baboon pregnancy, the abundance of *LEPR<sub>L</sub>* mRNA transcripts in fetal lung was approximately 10-fold greater and *LEPR<sub>S</sub>* transcript abundance was approximately 8-fold greater than in early pregnancy (Fig. 1). Leptin receptor protein, undetectable in fetal lungs at early and midgestation, was detected by Western blotting in late gestation and localized immunohistochemically in distal pulmonary epithelial cells, including type II cells (Fig. 2.). Therefore, because fetal serum leptin concentrations were significant and upregulation of leptin receptor occurred in late gestation, when the greatest progress toward fetal lung maturity is typically made, the potential exists for leptin to contribute to this vital process in primates.

#### *Regulation of Leptin and Leptin Receptor by Steroid Hormones*

Gender-based differences in the regulation of leptin synthesis are mediated by the steroid hormones [101, 102] and increases in serum leptin levels in early pregnancy may be owed to the stimulation of maternal adipose tissue by gestational steroids [103, 104]. Placental estrogens increase with advancing gestation and regulate multiple endocrine pathways [37]. Thus, estradiol ( $E_2$ ) administration enhanced the expression of leptin mRNA transcripts and protein secretion by adipocytes, both in vitro [102, 103] and in vivo [105]. Similarly, *Lep* expression in isolated rat adipocytes was inhibited by an estrogen receptor antagonist, while coinubation with a transcriptional inhibitor, prevented  $E_2$ -induced

increases in mRNA transcripts [106]. Also in rats, ovariectomy diminished *Lep* gene expression in white adipose tissue and caused a decline in serum leptin levels [107, 108], while administration of  $E_2$  reversed all the effects of ovariectomy. Ovariectomy was also reported to reduce serum leptin levels in humans [109]. Although leptin and  $E_2$  demonstrate similar profiles during the human menstrual cycle [110], disparate effects of estrogen on leptin synthesis in postmenopausal women have been reported [111], possibly as a result of variations in treatment regimens or patient adiposity. Further reports [112–114] suggest that leptin levels in women were not affected by the relatively small increases in estrogen associated with normal menstrual cyclicity, but were upregulated by the large increases in estrogen that typically result from ovulation induction, effects that may cast estrogen in the role of a dose-dependent regulator. However, as commensurate administration of  $E_2$  and progesterone to normally cycling women resulted in a dramatic increase in serum leptin concentrations, mechanisms relying on cooperation between the two steroids might also be implied [110]. Such cooperation might help explain the increased leptin concentrations common during the luteal phase of the menstrual cycle [115], although the reports that progesterone inhibited leptin secretion by rat adipocytes [116] and cultured, term human placental cells [117] further suggest species- and/or tissue-specific regulation by steroids.

Estrogens have been reported to regulate leptin expression by acting on a portion of the estrogen response element in the leptin promoter [106, 118]; with leptin production by cultured first-trimester human cytotrophoblast cells being dose-responsively potentiated by  $E_2$  [as reviewed, 119]. The presence of estrogen receptor in primate trophoblast [120] suggests that, as in adipose tissue [121], this is an estrogen receptor-mediated phenomenon. However, this effect has not yet been reported in syncytiotrophoblast collected in early pregnancy, or in long-term cultures of either purified cyto- or syncytiotrophoblast

collected in the second trimester or at term. Certainly, significant differences with respect to mechanisms influencing hormone synthesis exist for cells collected in first vs. third trimesters [122] and Bajoria et al. [21] concluded the potential effects of gestational age must be elucidated to fully understand leptin's role in pregnancy. Estrogen administration was also reported to elicit an increase in hypothalamic expression of the long form of the leptin receptor [123] in rats. This potential was originally put forward by Lindell et al. [124], who reported that a putative estrogen response element, close to the most frequently used transcriptional start sites of the leptin receptor gene in the rat hypothalamus, might be a mechanism by which estrogen regulates the leptin receptor. Differences in peripheral leptin concentrations could, therefore, also result from enhanced concentrations of solLEPR, which could slow metabolic clearance of the polypeptide and retain it in the circulation [42]. In this regard, serum  $E_2$  concentrations in women were correlated with circulating levels of soluble receptor, further suggesting the potential for alterations in leptin concentrations during periods of high estrogen availability, such as pregnancy [125].

We have hypothesized that elevated maternal leptin levels may be owed to enhanced transcriptional regulation in maternal adipose tissue and/or placenta, resulting from enhanced estrogen levels during pregnancy. Like the human, the baboon possesses a true maternal-fetoplacental unit, which relies on androgen precursors from the fetal adrenal gland for placental estrogen synthesis [37]. Thus, the surgical removal of the fetus, but not the placenta (fetectomy) at Day 100 of gestation inhibits estrogen production by the syncytiotrophoblast and reduces maternal serum  $E_2$  levels to near baseline. Therefore, we collected placental villous tissue, omental adipose tissue, and subcutaneous adipose tissue from baboons in late (Day 160) pregnancy [126]. In another group of pregnant baboons, estrogen production was inhibited at Day 100 by fetectomy. Placentas were left in situ until Day 160 of gestation when, following laparotomy and hysterotomy, they were retrieved. Maternal adipose tissues were collected at both Days 100 and 160 of pregnancy. Although fetectomy did not result in a decline in maternal estradiol to a level that would approximate levels in nonpregnant baboons, it did elicit an 87% decrease in maternal serum  $E_2$  concentrations. Leptin levels were essentially unaltered by fetectomy. However, in subcutaneous fat, the abundance of *LEP* mRNA transcripts declined about 5-fold as a consequence of fetectomy, while transcripts increased almost 3-fold in placental villous tissue. Leptin protein was quantitated by RIA in tissue homogenates collected near term. In subcutaneous fat, leptin levels in fetectomized baboons were approximately one half that of controls, while in placenta levels were 3-fold higher in fetectomized animals than in those with intact pregnancies. Therefore, although adipose leptin expression declined, increased placental expression suggested a compensatory mechanism and a tissue-specific regulatory role for estrogen (stimulatory in adipose tissue, inhibitory in placenta). In this regard, the potential for divergent transcriptional regulation in placenta and adipose tissue was previously known to exist due to the presence of a functional enhancer for the *LEP* gene in placental cells that is not present in adipocytes [127, 128]. The tissue-specific influence of estrogen in baboon pregnancy reinforces prior reports of divergent, tissue-specific effects of estrogen on leptin transcription [106, 129, 130].

As in humans, serum estrogen levels in nonpregnant baboons are dramatically lower than those during pregnancy. One might hypothesize, therefore, that, because the abundance of *LEP* mRNA transcripts in adipose tissue declined following

fetectomy, increased estrogen levels in pregnancy would prompt commensurate increases in *LEP* transcripts in adipose tissue. When venous blood and adipose tissues were collected from nonpregnant baboons in the midluteal phase of the menstrual cycle and from pregnant animals throughout gestation,  $E_2$  concentrations were lowest in cycling animals ( $0.06 \pm 0.02$  ng/ml) and increased with pregnancy and advancing gestation ( $4.17 \pm 0.87$  ng/ml on Day 160), as expected. However, although the abundance of *LEP* mRNA transcripts in adipose tissue was unchanged with regard to pregnancy or advancing gestation, tissue leptin concentrations in subcutaneous fat were significantly higher in pregnant than in nonpregnant baboons. Further, leptin increased in adipose tissue with advancing gestation. In addition, leptin receptor was assessed by immunoblotting in maternal serum, placenta, decidua, and amniochorion with advancing baboon pregnancy and with fetectomy [48]. Soluble receptor levels in serum increased approximately 60% between early and late normal pregnancy, with levels in fetectomized (estrogen-deprived) baboons being less than one half that in pregnancy-intact controls. The 3-fold increase in soluble receptor over that of nonpregnant baboons was identical to that observed by Kado et al. [42] in human pregnancy. Soluble receptor was only minimally detectable postpartum. The enhanced presence of the serum-borne receptor during pregnancy may implicate it in the regulation of maternal/fetal leptin levels and perhaps as a mediator of pregnancy-specific leptin resistance. Perhaps in this capacity, one 130-kDa isoform of the leptin receptor was identified in decidua and amniochorion. In decidua, this receptor increased 4-fold and, in amniochorion, increased 10-fold from early to late gestation. As shown in Figure 3, two isoforms (130 kDa, 150 kDa) of the leptin receptor were present in placental villous tissue. Levels of the 130-kDa isoform increased 3-fold in placental villous tissue from early to late normal gestation. Following fetectomy at midgestation, the 150-kDa isoform declined 50% ( $P < 0.01$ ).

Glucocorticoids also enhance leptin synthesis and secretion in adipose tissues [96, 131, 132]. In ovine pregnancy, treatment with cortisol or dexamethasone increased fetal leptin concentrations, while adrenalectomy suppressed them [131], an effect reminiscent of the impaired leptin production in glucocorticoid-deficient mice [133]. Yuen et al. [134] reported that leptin infusion shortly before ovine delivery suppressed fetal cortisol concentrations by approximately 40%, providing evidence for a negative feedback loop between leptin and the fetal hypothalamic-pituitary-adrenal (HPA) axis. Leptin levels in women suffering spontaneous abortions in the first trimester were abnormally low, implying a direct role for the polypeptide in pregnancy maintenance [135]. Indeed, recombinant leptin infused into the fetal circulation inhibited activation of the HPA axis in late ovine pregnancy, suggesting that mechanisms controlling the initiation of labor might be fine tuned by a metabolic cue that is related to fetal growth and originates in the placenta or fetal adipocytes [136]. With respect to the leptin receptor, maternal treatment with dexamethasone reduced leptin receptor mRNA in both porcine adipose tissue [137] and rat placenta [138, 139], interruptions in leptin signaling that might be traced to direct inhibition of the JAK/STAT pathway [140]. Enhanced cortisol levels in female adolescents, however, were highly correlated with circulating solLEPR concentrations [141], perhaps indicative of regulation of the cleavage of membrane-bound receptor [13]. These effects suggest that glucocorticoid-induced intrauterine growth restriction (IUGR) could be mediated, at least in part, by leptin/leptin receptor regulation in fetal adipose tissue or the placenta.



Just as estrogen and corticosteroids are associated with the enhancement of leptin synthesis, androgens are linked to leptin inhibition [142]. In healthy men, testosterone concentrations were negatively correlated with leptin in serum [143, 144], while in prostate cancer patients treated with a nonsteroidal antiandrogen, leptin levels rose [145]. These effects may be mirrored to some degree by the weaker androgens, as administration of dehydroepiandrosterone (DHEA) to women exhibiting adrenal insufficiency led to a decline in serum leptin levels, as compared with placebo-treated controls [146]. Similarly, it was reported that DHEA [147], DHEA-sulfate, androstenedione, and nonaromatizable dihydrotestosterone [94] are potent inhibitors of leptin secretion by adipose tissue [147]. In contrast, Machinal-Quelin et al. [148] reported a stimulation of leptin production by DHEA and testosterone in women's adipose tissue, although such effects may be owed to subsequent aromatization to estrogens. The relative effects (stimulatory or inhibitory) of the high levels of androgens in pregnancy [37, 120] are unknown.

#### Leptin and Pregnancy-Associated Pathologies

Decreases in placental *LEP* mRNA have been linked with decreased leptin concentrations in umbilical vein blood in cases of IUGR [149], suggesting that leptin influences fetal growth in response to a fetal demand that is relative to placental supply [150]. Studies of a twin pregnancy noted that a growth-restricted twin had markedly lower placental and cord blood leptin than its normal-size sibling [151] and that low cord-blood leptin levels directly reflected low concentrations in placenta. Subsequent observations from monochorionic twin pregnancies revealed that fetal and cord leptin levels were at least 2-fold higher in normal-size fetuses than in their growth-restricted twins [152], indicating a pivotal role in regulating growth [153]. Decreased leptin levels in cord and placenta of growth-restricted twins may be indirectly reflected by high levels in amniotic fluid and an increased rate of premature delivery that investigators postulated was attributable to hypoxia and poor cytotrophoblastic invasion [154]. Interestingly, fetuses in the normal-weight range exhibit either no correlation [155] or an inverse correlation [156] between conceptus mass and cord leptin concentrations with leptin levels in amniotic fluid, perhaps indicating a divergence in the mechanisms regulating leptin synthesis in these compartments. This specificity of mechanisms among components of the maternal-fetoplacental unit was also proposed in both normal and IUGR singleton pregnancies [157, 158]. IUGR babies maintain relatively low leptin levels as adults, suggesting permanently altered adipocyte function [159].

Perhaps related to leptin's role in implantation, preeclampsia is associated with shallow endometrial invasion, the sudden onset of maternal hypertension, and enhanced maternal and fetal leptin concentrations that are dramatically enhanced over the level of hyperleptinemia characteristic of human pregnancy [160–167]. This exacerbated increase in the maternal peripheral circulation, coupled with poor cytotrophoblastic invasion, typifies the preeclamptic state and serves as a marker for general placental insufficiency [168] and poor placental perfusion [169]. In a microarray analysis, placental susceptibility genes most likely to be associated with onset of the condition were evaluated and *LEP* was upregulated approximately 44-fold, an elevation reflected by commensurate protein levels [165]. Enhanced expression of *LEP* mRNA transcripts in placental tissue from preeclamptic women, over that of tissue from women with normal pregnancies, did not extend to a similar upregulation in maternal subcutaneous adipose tissue,

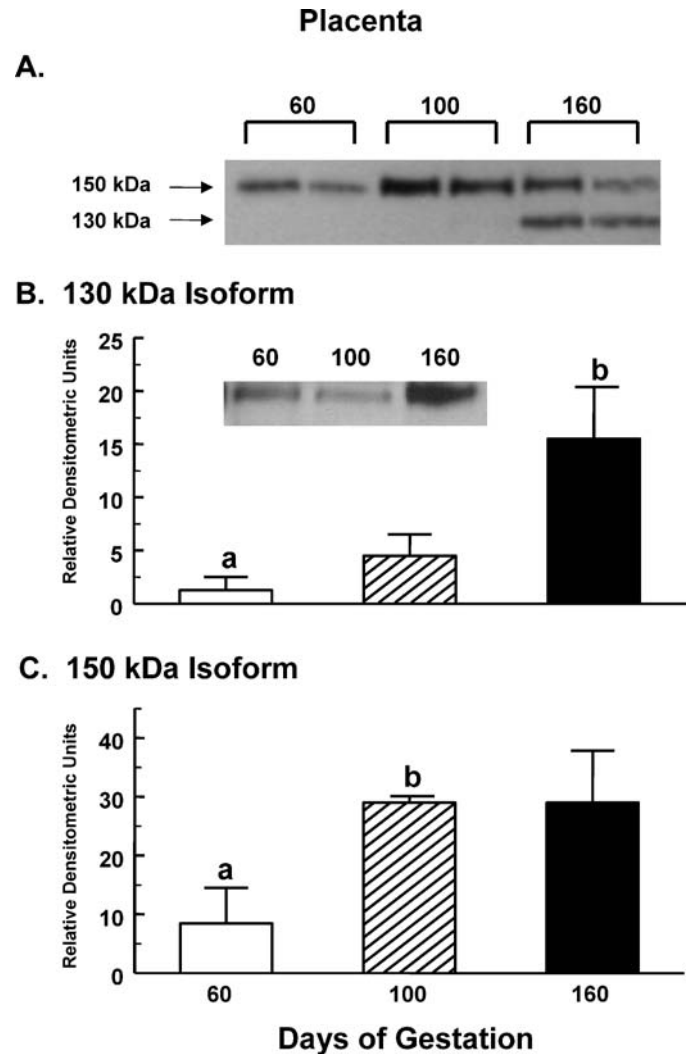

FIG. 3. Relative abundances of leptin receptor isoforms detected in placental villous tissue at approximately 60 ( $n=2$ ), 100 ( $n=2$ ), and 160 ( $n=2$ ) days of gestation (A). Relative densitometric units were determined for band intensities from immunoblots, and these values plotted for each isoform as the mean  $\pm$  SEM. A 130-kDa isoform (B,  $n=4$ ) increased in abundance between days 60 and 160 of gestation (inset: representative immunoblot with conditions optimized for imaging the isoform at early and midgestation). Levels of a 150-kDa isoform (C,  $n=4$ ) increased between days 60 and 100 of gestation. Different lowercase letters indicate significant differences between means (ab,  $P < 0.04$  and  $P < 0.02$  for B and C, respectively). Originally published in Edwards et al. [48].

further suggesting a specificity of placental involvement [170]. Even in preeclamptic women that had not yet evidenced elevated peripheral leptin levels, ratios of amniotic fluid leptin to maternal serum leptin were elevated and identified the very early stages of the condition [171]. Indeed, leptin has been found to be associated with maternal hypertension that may or may not proceed to preeclampsia [172, 173]. Preliminary evidence suggests that this exaggerated hyperleptinemia is a compensatory response to increase nutrient delivery to an underperfused placenta [174] and may be linked to both maternal adiposity and changes in bioavailable estrogen concentrations [175]. Although preeclampsia-associated hyperleptinemia has also been linked to enhanced solLEPR [176], conflicting reports [177, 178] call for further investigation.

As previously reviewed [11], pregnancy-associated diabetes is another pathology characterized by increased placental contributions to enhanced maternal leptin levels [179, 180].

Cord leptin levels in diabetic pregnancies were strongly correlated with both conceptus growth and the degree of glycemic control [181, 182], and among the offspring of gestational diabetics, serum leptin levels were enhanced over population norms until at least 9 yr of age [183]. Yuen et al. [184] reported that leptin administered in ovine pregnancy regulated fetal fat storage, leptin synthesis, and thermogenesis, suggesting a lipostatic function in utero. This role may be important when the fetus is exposed to an increased transplacental energy supply, as in pregnancies complicated by maternal glucose intolerance and fetal hyperglycemia. Although there is no evidence of leptin production in the ovine placenta [185], the potential of the placenta to contribute to the maternal leptin pool exists in primates as an enhanced hyperleptinemia in early pregnancy that is predictive of gestational diabetes is independent of maternal adiposity [186]. Interestingly, a recent report contends that leptin release from placental explants was less for tissues derived from women with gestational diabetes than for tissue derived from women with normal pregnancies [187]. Maternal adipose and skeletal muscle tissues from gestational diabetics, however, released significantly more leptin than did the same tissues from unaffected women.

Both preeclampsia [188] and pregnancy-associated diabetes [189] are associated with fetal hypoxia. To this end, Grosfeld et al. [190, 191] investigated the potential for decreased oxygen tension to upregulate leptin gene expression in human trophoblast-derived BeWo choriocarcinoma cells. The *LEP* gene was upregulated in this cell line by hypoxia, as previously demonstrated in preadipocytes [192], an effect mediated through activation of distinct *cis*-acting sequences of the leptin promoter [193]. This result may confirm the specificity of the placental gene promoter, although the effects of hypoxia have yet to be studied in normal trophoblast cells.

### *Leptin and the Fetal Origins of Adult Health and Disease*

Since Barker et al. [194, 195] originally postulated the relationship between low birthweight and the later manifestation of diseases, such as diabetes mellitus, hypertension, and coronary heart disease in adulthood, much interest has been generated in the fetal-programming paradigm. Into this arena, leptin has emerged as an important player, with Bouret and colleagues [196, 197] suggesting that alterations in leptin levels in utero prompt substantive hypothalamic changes in fetuses that eventually result in altered nutritional intake, energy metabolism, and adiposity in children and adults. In the rat, dexamethasone-induced IUGR, which culminates in high rates of adverse outcomes in adult offspring, is now known to directly result in a decline in fetal leptin concentrations due to a reduction in the transplacental passage of the polypeptide [77]. Intriguingly, the likely effects of reduced fetal leptin in IUGR-induced fetal programming (obesity, hyperinsulinemia, hyperphagia, reduced locomotor activity, etc.) may be effectively counteracted by neonatal leptin treatment [198]. In addition to studies in rodents, observations in sheep mimic those in women subjected to famine, which suggest that cardiovascular physiology and phenotypic predisposition to obesity are programmed as a natural component of fetal development [199]. With respect to fetal undernutrition, neonatal mice subjected to poor nutrition in utero responded to a high-fat diet with a premature onset of the leptin surge typical of young mice subjected to normal nutrition in utero [200]. This earlier-than-expected advent of the routine neonatal leptin surge strongly suggests that alterations to the fetal hypothalamic circuitry can be responsible for alterations in

adiposity and energy homeostasis in later life. Recently, this interaction of leptin with mechanisms potentially responsible for a fetal origin for many adult diseases was addressed quite clearly by Lecklin and colleagues [201]. Female rats that were injected with a recombinant adeno-associated virus vector that encoded the leptin gene, evidenced decreased food intake and commensurate loss of body weight, traits that were maintained throughout their subsequent breeding, pregnancies, and deliveries. Although these primary results served to illustrate the investigators' main goal of demonstrating the long-term efficacy of *LEP* gene therapy to elicit weight loss, further observations confirmed that the first generation offspring of leptin-transgene-expressing females also weighed significantly less than peer controls and maintained this difference into adulthood. While elucidation of the mechanisms by which leptin-induced reductions in maternal weight elicited weight losses in offspring must await further investigation, results of this and prior studies further confirm leptin's role in potentiating normal conceptus development and programming metabolic processes important to adult health.

## SUMMARY

In only a little more than a decade since leptin's discovery and its initial association with satiety and energy balance, it is now evident that the "fat hormone" also plays important roles in reproductive biology. Thus, a thorough review of this field is no longer complete without its inclusion. With this in mind, we have summarized those findings relating leptin and the physiology of pregnancy reported since our last review [9] and observed that leptin is now known to play a wide range of important roles, which extend from maternal physiology to implantation and from paracrine effects in the placenta to regulation of conceptus development and fetal growth. Perinatologists and neonatologists are faced with much fertile ground for the planning of future leptin-centered investigations. However, with respect to both the current knowledge in the field and the principal concerns of the medical community, we propose that they might be well advised to focus first on better understanding 1) the tissue-specific roles and mechanisms regulating leptin in individual components of the primate maternal-fetoplacental unit, 2) the interaction(s) of the polypeptide with common pathologies, such as IUGR, preeclampsia, and pregnancy-associated diabetes, and 3) the role played by leptin in utero with respect to those metabolic anomalies associated with childhood and adult obesity and the developmental origins of adult health and diseases.

## ACKNOWLEDGMENTS

Appreciation is expressed to Gabriella Pridjian, MD, Chair of the Department of Obstetrics and Gynecology at the Tulane University Health Sciences Center for her support; to Kenneth F. Swan, MS, and Eleese M. Bradford, MSPH, Section of Perinatal Research for their contributions in the laboratory, and to Mrs. Nathlynn Dellande for her assistance in manuscript and figure preparation.

## REFERENCES

1. Myers MG Jr. Leptin receptor signaling and the regulation of mammalian physiology. *Recent Prog Horm Res* 2004; 59:287-304.
2. Kershaw EE, Flier JS. Adipose tissue as an endocrine organ. *J Clin Endocrinol Metab* 2004; 89:2548-2556.
3. Henson MC, Castracane VD, Edwards DE. Leptin: from satiety signal to reproductive regulator. In: Henson MC, Castracane VD, (eds.), *Leptin and Reproduction*. New York: Kluwer Academic Press/Plenum Press Publishers, 2003:3-11.
4. Moschos S, Chan JL, Mantzoros CS. Leptin and reproduction: a review. *Fertil Steril* 2002; 77:433-444.

5. Yang SW, Kim SY. The relationship of the levels of leptin, insulin-like growth factor-I and insulin in cord blood with birth size, ponderal index, and gender difference. *J Pediatr Endocrinol Metab* 2000; 13:289–296.
6. Yang MJ, Liu RS, Hung JH. Leptin concentrations in the umbilical vein and artery. Relationship to maternal and neonatal anthropometry. *J Reprod Med* 2002; 47:645–650.
7. Petridou E, Mantzoros CS, Belechri M, Skalkidou A, Dessypris N, Papathoma E, Salvanos H, Lee JH, Kedikoglu S, Chrousos G, Trichopoulos D. Neonatal leptin levels are strongly associated with female gender, birth length, IGF-I levels and formula feeding. *Clin Endocrinol (Oxf)* 2005; 2:366–371.
8. Bellone S, Rapa A, Petri A, Zavallone A, Strigini L, Chiorboli E, Ciardi L, Aguzzi A, Bona G. Leptin levels as function of age, gender, aurological and hormonal parameters in 202 healthy neonates at birth and during the first month of life. *J Endocrinol Invest* 2004; 27:18–23.
9. Henson MC, Castracane VD. Leptin in pregnancy. *Biol Reprod* 2000; 63: 1219–1228.
10. Henson MC, Castracane VD. Leptin: roles and regulation in primate pregnancy. *Semin Reprod Med* 2002; 20:113–122.
11. Henson MC, Castracane VD. Leptin in primate pregnancy. In: Henson MC, Castracane VD, (eds.), *Leptin and Reproduction*. New York: Kluwer Academic Press/Plenum Press Publishers, 2003:239–263.
12. Bjorbaek C, Kahn BB. Leptin signaling in the central nervous system and the periphery. *Recent Prog Horm Res* 2004; 59:305–331.
13. Maamra M, Bidlingmaier M, Postel-Vinay M-C, Wu Z, Strausburger CJ, Ross RJM. Generation of human soluble leptin receptor by proteolytic cleavage of membrane-anchored receptors. *Endocrinology* 2001; 142: 4389–4393.
14. Gavrilova O, Barr V, Marcus-Samuels B, Reitman M. Hyperleptinemia of pregnancy associated with the appearance of a circulating form of the receptor. *J Biol Chem* 1997; 272:30546–30551.
15. Seeber RM, Smith JT, Waddell BJ. Plasma leptin binding activity and hypothalamic leptin receptor expression during pregnancy and lactation. *Biol Reprod* 2002; 66:1762–1767.
16. Ladyman SR, Grattan RH. Suppression of leptin receptor mRNA and leptin responsiveness in the ventromedial nucleus of the hypothalamus during pregnancy in the rat. *Endocrinology* 2005; 146:3868–3874.
17. Zastrow O, Seidel B, Kiess W, Thierry J, Keller E, Bottner A, Kratzsch J. The soluble leptin receptor is crucial for leptin action: evidence from clinical and experimental data. *Int J Obes Relat Metab Disord* 2003; 27: 1472–1478.
18. Yang G, Ge H, Boucher A, Yu X, Li C. Modulation of direct leptin signaling by soluble leptin receptor. *Mol Endocrinol* 2004; 18:1354–1362.
19. Sagawa N, Yura S, Itoh H, Mise H, Kakui K, Korita D, Takemura M, Nuamah MA, Ogawa Y, Masuzaki H, Nakao K, Fujii S. Role of leptin in pregnancy—a review. *Placenta* 2002; 23(suppl A, Trophoblast Res 16): S80–S86.
20. Domali E, Messinis IE. Leptin in pregnancy. *J Matern Fetal Neonatal Med* 2002; 12:222–230.
21. Bajoria R, Sooranna SR, Ward BS, Chatterjee R. Prospective function of placental leptin at maternal-fetal interface. *Placenta* 2002; 23:103–115.
22. Lepercq J, Challier J-C, Guerre-Millo M, Cauzac M, Vidal H, Hauguel-de Mouzon S. Prenatal leptin production: evidence that fetal adipose tissue produces leptin. *J Clin Endocrinol Metab* 2001; 86:2409–2413.
23. Yura S, Sagawa N, Mise H, Mori T, Masuzaki H, Ogawa Y, Nakao K. A positive umbilical venous-arterial difference of leptin level and its rapid decline after birth. *Am J Obstet Gynecol* 1998; 178:926–930.
24. Masuzaki H, Ogawa Y, Sagawa N, Hosoda K, Matsumoto T, Mise H, Nishimura H, Yoshimasa Y, Tanaka I, Mori T, Nakao K. Non-adipose tissue production of leptin: leptin as a novel placenta-derived hormone in humans. *Nat Med* 1997; 3:1029–1033.
25. Henson MC, Swan KF, O'Neil JS. Expression of placental leptin and leptin receptor transcripts in early pregnancy and at term. *Obstet Gynecol* 1998; 92:1020–1028.
26. Kawai M, Yamaguchi M, Murakami T, Shima K, Murata Y, Kishi K. The placenta is not the main source of leptin production in pregnant rat: gestational profile of leptin in plasma and adipose tissues. *Biochem Biophys Res Commun* 1997; 240:798–802.
27. Chien EK, Hara M, Rouard M, Yano H, Phillippe, Polonsky KS, Bell GI. Increase in serum leptin and uterine leptin receptor messenger RNA levels during pregnancy in rats. *Biochem Biophys Res Commun* 1997; 237:476–480.
28. Tomimatsu T, Yamaguchi M, Murakami T, Ogura K, Sakata M, Mitsuda N, Kanzaki T, Kurachi H, Irahara M, Miyake A, Shima K, Aono T, Murata Y. Increase of mouse leptin production by adipose tissue after midpregnancy: gestational profile of serum leptin concentration. *Biochem Biophys Res Commun* 1997; 240:213–215.
29. Henson MC, Castracane VD, O'Neil JS, Gimpel T, Swan KF, Green AE, Shi W. Serum leptin concentrations and expression of leptin transcripts in placental trophoblast with advancing baboon pregnancy. *J Clin Endocrinol Metab* 1999; 84:2543–2549.
30. Castracane VD, Hendrickx AG, Henson MC. Serum leptin in non-pregnant and pregnant women and in old and new world nonhuman primates: a brief communication. *Exp Biol Med (Maywood)* 2005; 230: 251–254.
31. Wang C, Medan MS, Shimizu K, Kojima C, Itoh M, Watanabe G, Taya K. Secretion of leptin throughout pregnancy and early postpartum period in Japanese monkeys: placenta as another potential source of leptin. *Endocrine* 2005; 27:75–82.
32. Amico JA, Thomas A, Crowley RS, Burmeister LA. Concentrations of leptin in the serum of pregnant, lactating, and cycling rats and of leptin messenger ribonucleic acid in rat placental tissue. *Life Sci* 1998; 63: 1387–1395.
33. Garcia MD, Casanueva FF, Dieguez C, Senaris RM. Gestational profile of leptin messenger ribonucleic acid (mRNA) content in the placenta and adipose tissue in the rat, and regulation of the mRNA levels of the leptin receptor subtypes in the hypothalamus during pregnancy and lactation. *Biol Reprod* 2000; 62:698–703.
34. Hoggard N, Hunter L, Lea RG, Trayhurn P, Mercer JG. Ontogeny of the expression of leptin and its receptor in the murine fetus and placenta. *Br J Nutr* 2000; 83:317–326.
35. Malik NM, Carter ND, Wilson CA, Scaramuzzi RJ, Stock MJ, Murray JF. Leptin expression in the fetus and placenta during mouse pregnancy. *Placenta* 2005; 26:47–52.
36. Zhao J, Kunz TH, Tumba N, Schulz L, Li C, Reeves M, Widmaier EP. Comparative analysis of expression and secretion of placental leptin in mammals. *Am J Physiol Regul Integr Comp Physiol* 2003; 275:R438–R446.
37. Henson MC. Pregnancy maintenance and the regulation of placental progesterone biosynthesis in the baboon. *Hum Reprod Update* 1998; 4: 389–405.
38. Comuzzie AG, Cole SA, Martin L, Carey KD, Mahaney MC, Blangero J, VandeBerg JL. The baboon as a nonhuman primate model for the study of the genetics of obesity. *Obes Res* 2003; 11:75–80.
39. Cole SA, Martin LJ, Peebles KW, Leland MM, Rice K, VandeBerg JL, Blangero J, Comuzzie AG. Genetics of leptin expression in baboons. *Int J Obes Rel Metab Disord* 2003; 27:778–783.
40. Akerman F, Lei ZM, Rao CV. Human umbilical cord and fetal membranes co-express leptin and its receptor genes. *Gynecol Endocrinol* 2002; 16:299–306.
41. Green AE, O'Neil JS, Swan KF, Bohm RP Jr, Ratterree MS, Henson MC. Leptin receptor transcripts are constitutively expressed in placenta and adipose tissue with advancing baboon pregnancy. *Proc Soc Exp Biol Med* 2000; 223:362–366.
42. Kado N, Kitawaki J, Koshiba H, Ishihara H, Kitaoka Y, Teramoto M, Honjo H. Relationships between the serum levels of soluble leptin receptor and free and bound leptin in non-pregnant women of reproductive age and women undergoing controlled ovarian hyperstimulation. *Hum Reprod* 2003; 18:715–720.
43. Krizova J, Eretova V, Haluzikova D, Anderlova K, Housova S, Kotlikova E, Haluzik M. Soluble leptin receptor and leptin levels in pregnant women before and after delivery. *Endocr Res* 2004; 30:379–385.
44. Lammert A, Kiess W, Bottner A, Glasow A, Kratzsch J. Soluble leptin receptor represents the main leptin binding activity in human blood. *Biochem Biophys Res Commun* 2001; 283:982–988.
45. Huang L, Wang Z, Li C. Modulation of circulating leptin levels by its soluble receptor. *J Biol Chem* 2001; 276:6343–6349.
46. Lammert A, Brockmann G, Renne U, Kiess W, Bottner A, Thierry J, Kratzsch J. Different isoforms of the soluble leptin receptor in non-pregnant and pregnant mice. *Biochem Biophys Res Commun* 2002; 298: 798–804.
47. Schulz S, Hackel C, Weise W. Hormonal regulation of neonatal weight: placental leptin and leptin receptors. *BJOG* 2000; 107:1486–1491.
48. Edwards DE, Bohm RP Jr, Purcell J, Ratterree MS, Swan KF, Castracane VD, Henson MC. Two isoforms of the leptin receptor are enhanced in pregnancy-specific tissues and soluble leptin receptor is enhanced in maternal serum with advancing gestation in the baboon. *Biol Reprod* 2004; 71:1746–1752.
49. Ryan NK, Van Der Hoek KH, Robertson SA, Norman RJ. Leptin and leptin receptor expression in the rat ovary. *Endocrinology* 2003; 144: 5006–5013.



50. Zerani M, Boiti C, Zampini D, Brecchia G, Dall' Aglio C, Ceccarelli P, Gobbetti A. Ob receptor in rabbit ovary and leptin in vitro regulation of corpora lutea. *J Endocrinol* 2004; 183:279–288.
51. Ashworth CJ, Hoggard N, Thomas L, Mercer JG, Wallace JM, Lea RG. Placental leptin. *Rev Reprod* 2000; 5:18–24.
52. Cameo P, Bischof P, Calvo JC. Effect of leptin on progesterone, human chorionic gonadotropin and interleukin-6 secretion by human term trophoblast cells in culture. *Biol Reprod* 2003; 68:472–477.
53. Islami D, Bischof P, Chardonnens D. Possible interactions between leptin, gonadotrophin-releasing hormone (GnRH-I and II) and human chorionic gonadotrophin (hCG). *Eur J Obstet Gynecol Reprod Biol* 2003; 110:169–175.
54. Lappas M, Permezel M, Rice GE. Leptin and adiponectin stimulate the release of pro-inflammatory cytokines and prostaglandins from human placenta and maternal adipose tissue via NF- $\kappa$ B, PPAR- $\gamma$  and ERK1/2. *Endocrinology* 2005; 146:3334–3342. First published online as doi:10.1210/en.6 April 2005.
55. Coxa R, Gualillo O, Pineda J, Garcia MC, Busturia MA, Aniel-Quiroga A, Martul P, Senaris RM. Effect of cyclic 3',5'-adenosine monophosphate, glucocorticoids, and insulin on leptin messenger RNA levels and leptin secretion in cultured human trophoblast. *Biol Reprod* 2001; 65:814–819.
56. Gonzalez RR, Caballero-Campo P, Jasper M, Mercader A, Devoto L, Pellicer A, Simon C. Leptin and leptin receptor are expressed in the human endometrium and endometrial leptin secretion is regulated by the human blastocyst. *J Clin Endocrinol Metab* 2000; 85:4883–4888.
57. Kawamura K, Sato N, Fukuda J, Kodama H, Kumagai J, Tanikawa H, Murata M, Tanaka T. The role of leptin during the development of mouse preimplantation embryos. *Mol Cell Endocrinol* 2003; 202:185–189.
58. Craig JA, Zhu H, Dyce PW, Wen L, Li J. Leptin enhances porcine preimplantation embryo development in vitro. *Mol Cell Endocrinol* 2005; 229:141–147.
59. Castellucci M, De Matteis R, Meisser A, Cancelli R, Monsurro V, Islami D, Sarzani R, Marziani D, Cinti S, Bischof P. Leptin modulates extracellular matrix molecules and metalloproteinases: possible implications for trophoblast invasion. *Mol Hum Reprod* 2000; 6:951–958.
60. Malik NM, Carter ND, Murray JF, Scaramuzzi RJ, Wilson CA, Stock MJ. Leptin requirement for conception, implantation, and gestation in the mouse. *Endocrinology* 2001; 142:5198–5202.
61. Gonzalez RR, Devoto L, Campana A, Bischof P. Effects of leptin, interleukin-1 $\alpha$ ?, interleukin-6, and transforming growth factor- $\beta$  on markers of trophoblast invasive phenotype: integrins and metalloproteinases. *Endocrine* 2001; 15:157–164.
62. Dominguez F, Pellicer A, Simon C. Paracrine dialogue in implantation. *Mol Cell Endocrinol* 2002; 186:175–181.
63. Boelhaue M, Sinowatz F, Wolf E, Paula-Lopes FF. Maturation of bovine oocytes in the presence of leptin improves development and reduces apoptosis of in vitro produced blastocysts. *Biol Reprod* 2005; first published online as 10.1095/biolreprod.105.041103.
64. Cervero A, Horcajadas JA, Martin J, Pellicer A, Simon C. The leptin system during human endometrial receptivity and preimplantation development. *J Clin Endocrinol Metab* 2004; 89:2442–2451.
65. Cervero A, Horcajadas JA, Dominguez F, Pellicer A, Simon C. Leptin system in embryo development and implantation: a protein in search of a function. *Reprod Biomed Online* 2005; 10:217–223.
66. Yoon SJ, Cha KY, Lee KA. Leptin receptors are down-regulated in uterine implantation sites compared to interimplantation sites. *Mol Cell Endocrinol* 2005; 232:27–35.
67. Henson MC, Castracane VD. Leptin and Reproduction. In: Henson MC, Castracane VD (eds.), *Leptin*. New York: Kluwer Academic Press/Plenum Press Publishers, 2006: (in press).
68. Ramos MP, Rueda BR, Leavis PC, Gonzalez RR. Leptin serves as an upstream activator of an obligatory signaling cascade in the embryo-implantation process. *Endocrinology* 2005; 146:694–701.
69. Schulz LC, Widmaier EP. The effect of leptin on mouse trophoblast cell invasion. *Biol Reprod* 2004; 71:1963–1967.
70. Ravelich SR, Shelling AN, Ramachandran A, Reddy S, Keelan JA, Wells DN, Peterson AJ, Lee RSF, Breier BH. Altered placental lactogen and leptin expression in placentomes from bovine nuclear transfer pregnancies. *Biol Reprod* 2004; 71:1862–1869.
71. Hoggard N, Haggarty P, Thomas L, Lea RG. Leptin expression in placental and fetal tissues: does leptin have a functional role? *Biochem Soc Trans* 2001; 29:57–63.
72. Christou H, Connors JM, Ziotopoulou M, Hatzidakis V, Papathanassoglou E, Ringer SA, Mantzoros CS. Cord blood leptin and insulin-like growth factor levels are independent predictors of fetal growth. *J Clin Endocrinol Metab* 2001; 86:935–938.
73. Phillip M, Moran O, Lazar L. Growth without growth hormone. *J Pediatr Endocrinol Metab* 2002; 15(suppl 5):1267–1272.
74. Vatten LJ, Nilsen ST, Odegard RA, Romundstad PR, Austgulen R. Insulin-like growth factor I and leptin in umbilical cord plasma and infant birth size at term. *Pediatrics* 2002; 109:1131–1135.
75. Lo H-C, Tsao L-Y, Hsu W-Y, Chen H-N, Yu W-K, Chi C-Y. Relation of cord serum levels of growth hormone, insulin-like growth factors, insulin-like growth factor binding proteins, leptin, and interleukin-6 with birth weight, birth length, and head circumference in term and preterm neonates. *Nutrition* 2002; 18:604–608.
76. Stepan CM, Swick AG. A role for leptin in brain development. *Biochem Biophys Res Commun* 1999; 256:600–602.
77. Smith JT, Waddell BJ. Leptin distribution and metabolism in the pregnant rat: transplacental leptin passage increases in late gestation but is reduced by excess glucocorticoids. *Endocrinology* 2003; 144:3024–3030.
78. Wyrwoll CS, Mark PJ, Waddell BJ. Directional secretion and transport of leptin and expression of leptin receptor isoforms in human placental BeWo cells. *Mol Cell Endocrinol* 2005; first published online as pmid 15955620.
79. Javadi MK, Godfrey KM, Taylor P, Robinson SM, Crozier SR, Dennison EM, Robinson JS, Breier BR, Arden NK, Cooper C. Umbilical cord leptin predicts neonatal bone mass. *Calcif Tissue Int* 2005; (published online).
80. Ogueh O, Sooranna S, Nicolaides KH, Johnson MR. The relationship between leptin concentration and bone metabolism in the human fetus. *J Clin Endocrinol Metab* 2000; 85:1997–1999.
81. Gordeladze JO, Reseland JE, Drevon CA. Pharmacological interference with transcriptional control of osteoblasts: a possible role for leptin and fatty acids in maintaining bone strength and body lean mass. *Curr Pharm Des* 2001; 7:275–290.
82. Eleftheriou F, Takeda S, Ebihara K, Magre J, Patano N, Kim CA, Ogawa Y, Liu X, Ware SM, Craigen WJ, Robert JJ, Vinson C, et al. Serum leptin level is a regulator of bone mass. *Proc Natl Acad Sci U S A* 2004; 101:3258–3263.
83. Whipple T, Sharkey N, Demers L, Williams N. Leptin and the skeleton. *Clin Endocrinol (Oxf)* 2002; 57:701–711.
84. Morroni M, De Matteis R, Palumbo C, Ferretti M, Villa I, Rubinacci A, Cinti S, Marotti G. In vivo leptin expression in cartilage and bone cells of growing rats and adult humans. *J Anat* 2004; 205:291–296.
85. Kume K, Satomura K, Nishisho S, Kitaoka E, Yamanouchi K, Tobiume S, Nagayama M. Potential role of leptin in endochondral ossification. *J Histochem Cytochem* 2002; 50:159–169.
86. Sierra-Honigsmann MR, Nath AK, Murakami C, Garcia-Cardena G, Papapetropoulos A, Sessa WC, Madge LA, Schechner JS, Schwabb MB, Polverini PJ, Flores-Riveros JR. Biological action of leptin as an angiogenic factor. *Science* 1998; 281:1683–1686.
87. Bouloumie A, Lolmede K, Sengenès C, Galitzky J, Lafontan M. Angiogenesis in adipose tissue. *Ann Endocrinol (Paris)* 2002; 63:91–95.
88. Islami D, Bischof P, Chardonnens D. Modulation of placental vascular endothelial growth factor by leptin and hCG. *Mol Hum Reprod* 2003; 9:395–398.
89. Bolt RJ, van Weissenbruch MM, Lafeber HN, Delemarre-van de Waal HA. Glucocorticoids and lung development in the fetus and preterm infant. *Pediatr Pulmonol* 2001; 32:76–91.
90. Torday JS, Sun H, Wang L, Torres E, Sunday ME, Rubin LP. Leptin mediates the parathyroid hormone-related protein paracrine stimulation of fetal lung maturation. *Am J Physiol Lung Cell Mol Physiol* 2002; 282:L405–L410.
91. Torday JS, Rehan VK. Stretch-stimulated surfactant synthesis is coordinated by the paracrine actions of PTHrP and leptin. *Am J Physiol Lung Cell Mol Physiol* 2002; 283:L130–L135.
92. Pepe GJ, Ballard PL, Albrecht ED. Fetal lung maturation in estrogen-deprived baboons. *J Clin Endocrinol Metab* 2003; 88:471–477.
93. Provost PR, Blomquist CH, Drolet R, Flamand N, Tremblay Y. Androgen inactivation in human lung fibroblasts: variations in levels of 17 $\beta$ -hydroxysteroid dehydrogenase type 2 and 5  $\alpha$ -reductase activity compatible with androgen inactivation. *J Clin Endocrinol Metab* 2002; 87:3883–3892.
94. Casabiell X, Pineiro V, Vega F, De La Cruz LF, Dieguez C, Casanueva FF. Leptin, reproduction and sex steroids. *Pituitary* 2001; 4:93–99.
95. Morash BA, Ur E, Wilkinson M. Pituitary leptin gene expression is reduced by neonatal androgenization of female rats. *Pituitary* 2001; 4:63–70.
96. Leal-Cerro A, Soto A, Martinez MA, Dieguez C, Casanueva FF. Influence of cortisol status on leptin secretion. *Pituitary* 2001; 4:111–116.
97. Ng PC, Lam CW, Lee CH, Fok TF, Chan IH, Ma KC, Wong E. Changes

- in serum leptin concentration after corticosteroid treatment in preterm infants. *Acta Paediatr* 2002; 91:684–690.
98. Sugden MC, Langdown ML, Munns MJ, Holness MJ. Maternal glucocorticoid treatment modulates placental leptin and leptin receptor expression and materno-fetal leptin physiology during late pregnancy, elicits hypertension associated with hyperleptinemia in the early-growth-retarded adult offspring. *Eur J Endocrinol* 2001; 145:529–539.
  99. Bergen HT, Cherlet TC, Manuel P, Scott JE. Identification of leptin receptors in lung and isolated fetal type II cells. *Am J Respir Cell Mol Biol* 2002; 27:71–77.
  100. Henson MC, Swan KF, Edwards DE, Hoyle GW, Purcell J, Castracane VD. Leptin receptor expression in fetal lung increases in late gestation in the baboon: a model for human pregnancy. *Reproduction* 2004; 127:87–94.
  101. Popovic V, Casanueva FF. Leptin, nutrition and reproduction: new insights. *Hormones* 2002; 1:204–217.
  102. Monjo M, Pujol E, Roca P. Alpha-2 to beta-3 adrenoceptor switch in 3T3-L1 preadipocytes and adipocytes: modulation by testosterone, 17-beta estradiol, and progesterone. *Am J Physiol Endocrinol Metab* 2005; 289:E145–E150.
  103. Kronfeld-Schor N, Zhao J, Silvia BA, Bicer E, Matthews PT, Urban R, Zimmerman S, Kunz TH, Widmaier EP. Steroid-dependent up-regulation of adipose leptin secretion in vitro during pregnancy in mice. *Biol Reprod* 2000; 63:274–280.
  104. Yamada M, Matsuzaki T, Iwasa T, Shimizu F, Tanaka N, Ogata R, Kiyokama M, Yasui T, Irahara M, Aono T. Serum leptin levels in women throughout life; relationship to body mass index and serum estradiol levels. *Jpn J Reprod Endocrinol* 2003; 8:55–60.
  105. Tanaka M, Nakaya S, Kumai T, Watanabe M, Tateishi T, Shimizu H, Kobayashi S. Effects of estrogen on serum leptin levels and leptin mRNA expression in adipose tissue in rats. *Horm Res* 2001; 56:98–104.
  106. Machinal F, Dieudonne M-N, Leneuve M-C, Pecquery R, Giudicelli Y. In vivo and in vitro *ob* gene expression and leptin secretion in rat adipocytes: evidence for a regional specific regulation by sex steroid hormones. *Endocrinology* 1999; 140:1567–1574.
  107. Yoneda N, Saito S, Kimura M, Yamada M, Iida M, Murakami T, Irahara M, Shima K, Aono T. The influence of ovariectomy on *ob* gene expression in rats. *Horm Metab Res* 1998; 30:263–265.
  108. Chu S-C, Chou Y-C, Liu J-Y, Chen C-H, Shyu J-C, Chou F-P. Fluctuation of serum leptin level in rats after ovariectomy and the influence of estrogen supplement. *Life Sci* 1999; 64:2299–2306.
  109. Messinis IE, Milingos SD, Alexandris E, Kariotis I, Kollios G, Seferiadis K. Leptin concentrations in normal women following bilateral ovariectomy. *Hum Reprod* 1999; 14:913–918.
  110. Cella F, Giordano G, Cordera R. Serum leptin concentrations during the menstrual cycle in normal-weight women: effects of an oral triphasic estrogen-progestin medication. *Eur J Endocrinol* 2000; 142:174–178.
  111. Castracane VD, Kraemer RR, Franken MA, Kraemer GR, Gimpel TL. Serum leptin concentration in women: effect of age, obesity and estrogen administration. *Fertil Steril* 1998; 70:472–477.
  112. Yamada M, Irahara M, Tezuka M, Murakami T, Shima K, Aono T. Serum leptin profiles in the normal menstrual cycles and gonadotropin treatment cycles. *Gynecol Obstet Invest* 2000; 49:119–123.
  113. Lindheim SR, Sauer MV, Carmina F, Chang PL, Zimmerman R, Lobo RA. Circulating leptin levels during ovulation induction: relation to adiposity and ovarian morphology. *Fertil Steril* 2000; 73:493–498.
  114. Unkila-Kallio L, Andersson S, Koistinen HA, Karonen SL, Ylikorkala O, Tiitinen A. Leptin during assisted reproductive cycles: the effect of ovarian stimulation and of very early pregnancy. *Hum Reprod* 2001; 16: 657–662.
  115. Geithovell F, Jochmann N, Widjaja A, Horn R, Brabant G. Serum pattern of circulating free leptin, bound leptin, and soluble leptin receptor in the physiological menstrual cycle. *Fertil Steril* 2004; 81:398–402.
  116. Abelenda M, Puerta M. Leptin release is decreased in white adipocytes isolated from progesterone-treated rats. *Endocr Res* 2004; 30:335–342.
  117. Coia R, Martul P, Algorta J, Aniel-Quiroga MA, Busturia MA, Senaris R. Progesterone and human placental lactogen inhibit leptin secretion on cultured trophoblast cells from human placentas at term. *Gynecol Endocrinol* 2005; 21:27–32.
  118. O'Neil JS, Burrow ME, Green AE, McLachlan JA, Henson MC. Effects of estrogen on leptin gene promoter activation in MCF-7 breast cancer and JEG-3 choriocarcinoma cells: selective regulation via estrogen receptors  $\alpha$  and  $\beta$ . *Mol Cell Endocrinol* 2001; 176:67–75.
  119. Islami D, Bischof P. Leptin in the placenta In: Henson MC, Castracane VD, (eds.), *Leptin and Reproduction*. New York: Kluwer Academic Press/Plenum Press Publishers, 2003:201–220.
  120. Albrecht ED, Aberdeen GW, Pepe GJ. The role of estrogen in the maintenance of primate pregnancy. *Am J Obstet Gynecol* 2000; 182: 432–438.
  121. Mystkowski P, Schwartz MW. Gonadal steroids and energy homeostasis in the leptin era. *Nutrition* 2000; 16:937–946.
  122. Malek A, Willi A, Muller J, Sager R, Hanggi W, Bersinger N. Capacity for hormone production of cultured trophoblast cells obtained from placentae at term and in early pregnancy. *J Assist Reprod Genet* 2001; 18:299–304.
  123. Rocha M, Bing C, Williams G, Puerta M. Physiologic estradiol levels enhance hypothalamic expression of the long form of the leptin receptor in intact rats. *J Nutr Biochem* 2004; 15:328–334.
  124. Lindell K, Bennett PA, Itoh Y, Robinson ICAF, Carlsson LMS, Carlsson B. Leptin receptor 5' untranslated regions in the rat: relative abundance, genomic organization and relation to putative response elements. *Mol Cell Endocrinol* 2001; 172:37–45.
  125. Chan JL, Bluhner S, Yiannakouris N, Suchard MA, Kratzsch J, Mantzoros CS. Regulation of circulating soluble leptin receptor levels by gender, adiposity, sex steroids, and leptin. Observational and interventional studies in humans. *Diabetes* 2002; 51:2105–2112.
  126. O'Neil JS, Green AE, Edwards DE, Swan KF, Gimpel T, Castracane VD, Henson MC. Regulation of leptin and leptin receptor in baboon pregnancy: effects of advancing gestation and fetectomy. *J Clin Endocrinol Metab* 2001; 86:2518–2524.
  127. Bi S, Gavrilova O, Gong DW, Mason MM, Reitman M. Identification of a placental enhancer for the human leptin gene. *J Biol Chem* 1997; 272: 30583–30588.
  128. Ebihara K, Ogawa Y, Isse N, Mori K, Tamura N, Masuzaki H, Kohno K, Yura S, Hosoda K, Sagawa N, Nakao K. Identification of the human leptin 5' flanking sequences involved in the trophoblast-specific transcription. *Biochem Biophys Res Commun* 1997; 241:658–663.
  129. Villafuerte BC, Fine JB, Bai Y, Zhao W, Fleming S, DiGirolamo M. Expressions of leptin and insulin-like growth factor-I are highly correlated and region-specific in adipose tissue of growing rats. *Obes Res* 2000; 8:646–655.
  130. Li AW, Morash B, Hollenberg AN, Ur E, Wilkinson M, Murphy PR. Transcriptional regulation of the leptin gene promoter in rat GH3 pituitary and C6 glioma cells. *Mol Cell Endocrinol* 2001; 176:57–65.
  131. Forhead AJ, Thomas L, Crabtree J, Hoggard N, Gardner DS, Giussani DA, Fowden AL. Plasma leptin concentration in fetal sheep during late gestation: ontogeny and effect of glucocorticoids. *Endocrinology* 2002; 143:1166–1173.
  132. Faulconier Y, Delavaud C, Chilliard Y. Insulin and (or) dexamethasone effects on leptin production and metabolic activities of ovine adipose tissue explants. *Reprod Nutr Dev* 2003; 43:237–250.
  133. Jeong K-H, Sakihara S, Widmaier EP, Majzoub JA. Impaired expression and abnormal response to fasting in corticotropin-releasing hormone-deficient mice. *Endocrinology* 2004; 145:3174–3181.
  134. Yuen BSJ, Owens PC, Symonds ME, Keisler DH, McFarlane JR, Kauter KG, McMillen IC. Effects of leptin on fetal plasma adrenocorticotrophic hormone and cortisol concentrations and the timing of parturition in the sheep. *Biol Reprod* 2004; 70:1650–1657.
  135. Laird SM, Quinton ND, Anstie B, Li TC, Blakemore AI. Leptin and leptin binding activity in women with recurrent miscarriage: correlation with pregnancy outcome. *Hum Reprod* 2001; 16:2008–2013.
  136. Howe DC, Gertler A, Challis JRG. The late gestation increase in circulating ACTH and cortisol in the fetal sheep is suppressed by intracerebroventricular infusion of recombinant ovine leptin. *J Endocrinol* 2002; 174:259–262.
  137. Ramsay TG, Richards MP. Hormonal regulation of leptin and leptin receptor expression in porcine subcutaneous adipose tissue. *J Anim Sci* 2004; 82:3486–3492.
  138. Smith JT, Waddell BJ. Leptin receptor expression in the rat placenta: changes in Ob-Ra, Ob-Rb, and Ob-Re with gestational age and suppression by glucocorticoids. *Biol Reprod* 2002; 67:1204–1210.
  139. Waddell BJ, Smith JT. Leptin in rodent pregnancy. In: Henson MC, Castracane VD, (eds.), *Leptin and Reproduction*. New York: Kluwer Academic Press/Plenum Press Publishers, 2003:221–238.
  140. Ishida-Takahashi R, Uotani S, Abe T, Degawa-Yamauchi M, Fukushima T, Fujita N, Sakamaki H, Yamasaki H, Yamaguchi Y, Eguchi K. Rapid inhibition of leptin signaling by glucocorticoids in vitro and in vivo. *J Biol Chem* 2004; 279:19658–19664.
  141. Misra M, Miller KK, Almazan C, Ramaswamy K, Aggarwal A, Herzog DB, Neubauer G, Breu J, Klibanski A. Hormonal and body composition predictors of soluble leptin receptor, leptin, and free leptin index in adolescent girls with anorexia nervosa and controls with relation to insulin sensitivity. *J Clin Endocrinol Metab* 2004; 89:3486–3495.

142. Reidy SP, Weber JM. Leptin: an essential regulator of lipid metabolism. *Comp Biochem Physiol A Mol Integr Physiol* 2000; 125:285–298.
143. Thomas T, Burguera B, Melton LJ III, Atkinson EJ, O'Fallon WM, Riggs BL, Khosla S. Relationship of serum leptin levels with body composition and sex steroid and insulin levels in men and women. *Metabolism* 2000; 49:1278–1284.
144. Soderberg S, Olsson T, Eliasson M, Johnson O, Brismar K, Carlstrom K, Ahren B. A strong association between biologically active testosterone and leptin in non-obese men and women is lost with increasing (central) adiposity. *Int J Obes Relat Metab Disord* 2001; 25:98–105.
145. Nowicki M, Bryc W, Kokot F. Hormonal regulation of appetite and body mass in patients with advanced prostate cancer treated with combined androgen blockade. *J Endocrinol Invest* 2001; 24:31–36.
146. Callies F, Fassnacht M, van Vlijmen JC, Koehler I, Huebler D, Seibel MJ, Arlt W, Allolio B. Dehydroepiandrosterone replacement in women with adrenal insufficiency: effects on body composition, serum leptin, bone turnover, and exercise capacity. *J Clin Endocrinol Metab* 2001; 86: 1968–1972.
147. Apostolova G, Schweizer RAS, Balazs Z, Kostadinova RM, Odermatt A. Dehydroepiandrosterone inhibits the amplification of glucocorticoid action in adipose tissue. *Am J Physiol Endocrinol Metab* 2005; 288: E957–E964.
148. Machinal-Quelin F, Dieudonne M-N, Pecquery R, Leneuve M-C, Giudicelli Y. Direct in vitro effects of androgens and estrogens on *ob* gene expression and leptin secretion in human adipose tissue. *Endocrine* 2002; 18:179–184.
149. Lea RG, Howe D, Hannah LT, Bonneau O, Hunter L, Hoggard N. Placental leptin in normal, diabetic and fetal growth-retarded pregnancies. *Mol Hum Reprod* 2000; 6:763–769.
150. Hoggard N, Crabtree J, Allstaff S, Abramovich DR, Haggarty P. Leptin secretion to both the maternal and fetal circulations in the ex vivo perfused human term placenta. *Placenta* 2001; 22:347–352.
151. Sooranna SR, Ward S, Bajoria R. Discordant fetal leptin levels in monochorionic twins with chronic midtrimester twin-twin transfusion syndrome. *Placenta* 2001; 22:392–398.
152. Sooranna SR, Ward S, Bajoria R. Fetal leptin influences birth weight in twins with discordant growth. *Pediatr Res* 2001; 49:667–672.
153. Yildiz L, Avci B, Ingec M. Umbilical cord and maternal blood leptin concentrations in intrauterine growth retardation. *Clin Chem Lab Med* 2002; 40:1114–1117.
154. Chan T-F, Chung Y-F, Chen H-S, Su J-H, Yuan S-SF. Elevated amniotic fluid leptin levels in early second trimester are associated with earlier delivery and lower birthweight in twin pregnancy. *Acta Obstet Gynecol Scand* 2004; 83:707–710.
155. Oktom O, Dedeoglu N, Oymak Y, Sezen D, Koksall L, Pekin T, Gokaslan H, Kavak ZN. Maternal serum, amniotic fluid and cord leptin levels at term: their correlations with fetal weight. *J Perinat Med* 2004; 32:226–271.
156. Woelfer B, Hafner E, Metznerbauer M, Schuchter K, Philipp K. The influence of leptin on placental and fetal volume measured by three-dimensional ultrasound in the second trimester. *Placenta* 2005; 26:124–128.
157. Arslan M, Yazici G, Erdem A, Erdem M, Ozturk-Arslan E, Himmetoglu O. Endothelin 1 and leptin in the pathophysiology of intrauterine growth restriction. *Int J Gynecol Obstet* 2004; 84:120–126.
158. Pighetti M, Tommaselli GA, D'Elia A, DiCarlo C, Mariano A, DiCarlo A, Nappi C. Maternal serum and cord blood leptin concentrations with fetal growth restriction. *Obstet Gynecol* 2003; 102:535–543.
159. Jaquet D, Gaboriau A, Czernichow P, Levy-Marchal C. Relatively low serum leptin levels in adults born with intra-uterine growth retardation. *Int J Obes Relat Metab Disord* 2001; 25:491–495.
160. Anim-Nyame N, Sooranna SR, Steer PJ, Johnson MR. Longitudinal analysis of maternal plasma leptin concentrations during normal pregnancy and pre-eclampsia. *Hum Reprod* 2000; 15:2033–2036.
161. Teppa RJ, Ness RB, Crombleholme WR, Roberts JM. Free leptin is increased in normal pregnancy and further increased in preeclampsia. *Metabolism* 2000; 49:1043–1048.
162. Linnemann K, Malek A, Schneider H, Fusch C. Physiological and pathological regulation of feto/placento/maternal leptin expression. *Biochem Soc Trans* 2001; 29:86–90.
163. Chappell LC, Seed PT, Briley A, Kelly FJ, Hunt BJ, Charnock-Jones DS, Mallet AI, Poston L. A longitudinal study of biochemical variables in women at risk of preeclampsia. *Am J Obstet Gynecol* 2002; 187:127–136.
164. Odegard RA, Vatten LJ, Nilsen ST, Salvesen KA, Austgulen R. Umbilical cord plasma leptin is increased in preeclampsia. *Am J Obstet Gynecol* 2002; 186:427–432.
165. Reimer T, Koczan D, Gerber B, Richter D, Thiesen HJ, Friese K. Microarray analysis of differentially expressed genes in placental tissue of pre-eclampsia: up-regulation of obesity-related genes. *Mol Hum Reprod* 2002; 8:674–680.
166. Kocyigit Y, Atamer Y, Atamer A, Tuzcu A, Akkus Z. Changes in serum levels of leptin, cytokines and lipoprotein in pre-eclamptic and normotensive pregnant women. *Gynecol Endocrinol* 2004; 19:267–273.
167. Baksu A, Ozkan A, Goker N, Baksu B, Uluocak A. Serum leptin changes in preeclamptic pregnant women: relationship to thyroid-stimulating hormone, body mass index, and proteinuria. *Am J Perinatol* 2005; 22: 161–164.
168. Lepercq J, Guerre-Millo M, Andre J, Cauzac M, Haguel-de Mouzon S. Leptin: a potential marker of placental insufficiency. *Gynecol Obstet Invest* 2003; 55:151–155.
169. Moore LE, Wallace KL, Alexander BT, May WL, Thigpen BD, Bennett WA. Reduced placental perfusion causes an increase in maternal serum leptin. *Placenta* 2003; 24:877–881.
170. Haugen F, Ranheim T, Harsem NK, Lips E, Staff AC, Drevon CA. Increased plasma levels of adipokines in preeclampsia: relationship to placenta and adipose tissue gene expression. *Am J Physiol Endocrinol Metab* 2005; epub ahead of print. 6 April 2005.
171. Chan TF, Su JH, Chung YF, Hsu YH, Yeh YT, Jong SB, Yuan SS. Amniotic fluid and maternal serum leptin levels in pregnant women who subsequently develop preeclampsia. *Eur J Obstet Gynecol Reprod Biol* 2003; 108:50–53.
172. Buhling KJ, Harder T, Sehoul J, Nann J, Plagemann A, Dudenhausen JW. Independent association between leptin and blood pressure during third trimester in normal and gestational diabetic pregnancies. *Eur J Obstet Gynecol Reprod Biol* 2005; 119:180–184.
173. Ozkan S, Erel CT, Madazli R, Aydin K. Serum leptin levels in hypertensive disorder of pregnancy. *Eur J Obstet Gynecol Reprod Biol* 2005; 120:158–163.
174. Tommaselli GA, Pighetti M, Nasti A, D'Elia A, Guida M, Di Carlo C, Bifulco G, Nappi C. Serum leptin levels and uterine Doppler flow velocimetry at 20 weeks gestation as markers for the development of preeclampsia. *Gynecol Endocrinol* 2004; 19:160–165.
175. Acromite M, Ziotopoulou M, Orlova C, Mantzoros C. Increased leptin levels in preeclampsia: associations with BMI, estrogen and SHBG levels. *Hormones* 2004; 3:46–52.
176. Challier J, Galtier M, Bintein T, Cortez A, Lepercq J, Hauguel-de Mouzon S. Placental receptor isoforms in normal and pathological pregnancies. *Placenta* 2003; 24:92–99.
177. Li RH, Poon SC, Yu MY, Wong YF. Expression of placental leptin and leptin receptors in preeclampsia. *Int J Gynecol Pathol* 2004; 23:378–385.
178. Iwagaki S, Yokoyama Y, Tang L, Takahashi Y, Nakagawa Y, Tamaya T. Augmentation of leptin and hypoxia-inducible factor 1 alpha mRNAs in the pre-eclamptic placenta. *Gynecol Endocrinol* 2004; 18:263–268.
179. Vitoratos N, Chrystodoulacos G, Salamalekis E, Kassanos D, Kouskouni E, Creatsas G. Fetoplacental leptin levels and their relation to birth weight and insulin in gestational diabetic pregnant women. *J Obstet Gynaecol* 2002; 22:29–33.
180. Radaelli T, Varastehpour A, Catalano P, Hauguel-de Mouzon S. Gestational diabetes induces placental genes for chronic stress and inflammatory pathways. *Diabetes* 2003; 52:2951–2958.
181. Manderson JG, Patterson CC, Hadden DR, Traub AI, Leslie H, McCance DR. Leptin concentrations in maternal serum and cord blood in diabetic and nondiabetic pregnancy. *Am J Obstet Gynecol* 2003; 188:1326–1332.
182. Lindsay RS, Hamilton BA, Calder AA, Johnstone FD, Walker JD. The relation of insulin, leptin and IGF-1 to birthweight in offspring of women with type 1 diabetes. *Clin Endocrinol (Oxf.)* 2004; 61:353–359.
183. Malee MP, Verma A, Messerlian G, Tucker R, Vohr BR. Association between maternal and child leptin levels 9 years after pregnancy complicated by gestational diabetes. *Horm Metab Res* 2002; 34:212–216.
184. Yuen BSJ, Owens PC, Muhlhauser BS, Roberts CT, Symonds ME, Keisler DH, McFarlane JR, Kauter KG, Evens Y, McMillen IC. Leptin alters the structural and functional characteristics of adipose tissue before birth. *FASEB J* 2003; 17:1102–1104.
185. Devaskar SU, Anthony R, Hay W Jr. Ontogeny and insulin regulation of fetal ovine white adipose tissue leptin expression. *Am J Physiol Regul Integr Comp Physiol* 2002; 282:R431–R438.
186. Qiu C, Williams MA, Vadachkoria S, Frederick IO, Luthy DA. Increased maternal plasma leptin in early pregnancy and risk of gestational diabetes mellitus. *Obstet Gynecol* 2004; 103:519–525.
187. Lappas M, Yee K, Permezel M, Rice GE. Release and regulation of leptin, resistin, and adiponectin from human placenta, fetal membranes, and maternal adipose tissue and skeletal muscle from normal and



- gestational diabetes mellitus-complicated pregnancies. *J Endocrinol* 2005; 186:457–465.
188. Hytinen T, Koistinen HA, Koivisto VA, Karonen SL, Rutanen EM, Andersson S. Increased leptin concentration in preterm infants of pre-eclamptic mothers. *Arch Dis Child Fetal Neonatal Ed* 2000; 83:F13–F16.
  189. Hytinen T, Koistinen HA, Teramo K, Karonen SL, Koivisto VA, Andersson S. Increased fetal leptin in type I diabetes mellitus pregnancies complicated by chronic hypoxia. *Diabetologia* 2000; 43:709–713.
  190. Grosfeld A, Turban S, Andre J, Cauzac M, Challier J-C, Hauguel-de Mouzon S, Guerre-Millo M. Transcriptional effect of hypoxia on placental leptin. *FEBS Lett* 2001; 502:122–126.
  191. Grosfeld A, Andre J, Hauguel-de Mouzon S, Berra E, Pouyssegur J, Guerre-Millo M. Hypoxia-inducible factor I transactivates the human leptin gene promoter. *J Biol Chem* 2002; 277:42953–42957.
  192. Lolmede K, Durand de Saint Front V, Galitzky J, Lafontan M, Bouloumie A. Effects of hypoxia on the expression of proangiogenic factors in differentiated 3T3-F442A adipocytes. *Int J Obes Relat Metab Disord* 2003; 27:1187–1195.
  193. Poston L. Does leptin play a role in preeclampsia? In: Henson MC, Castracane VD, (eds.), *Leptin and Reproduction*. New York: Kluwer Academic Press/Plenum Press Publishers, 2003:299–310.
  194. Barker DJP. In utero programming of chronic disease. *Clin Sci* 1998; 95: 115–128.
  195. Barker DJP, Eriksson JG, Forsen T, Osmond C. Fetal origins of adult disease: strength of effects and biological basis. *Int J Epidemiol* 2002; 31: 1235–1239.
  196. Bouret SG, Draper SJ, Simerly RB. Formation of projection pathways from the arcuate nucleus of the hypothalamus to hypothalamic regions implicated in the neural control of feeding behavior in mice. *J Neurosci* 2004; 24:2797–2805.
  197. Bouret SG, Draper SJ, Simerly RB. Trophic action of leptin on hypothalamic neurons that regulate feeding. *Science* 2004; 304:108–110.
  198. Vickers MH, Gluckman PD, Coveny AH, Hofman PL, Cutfield WS, Gertler A, Breier BH, Harris M. Neonatal leptin treatment reverses developmental programming. *Endocrinology* 2005; 146:4211–4216.
  199. Ross MG, Desai M. Gestational programming: population survival effects of drought and famine during pregnancy. *Am J Physiol Regul Integr Comp Physiol* 2005; 288:R97–R103.
  200. Yura S, Itoh H, Sagawa N, Yamamoto H, Masuzaki H, Nakao K, Kawamura M, Takemura M, Kakui K, Ogawa Y, Fujii S. Role of premature leptin surge in obesity resulting from intrauterine undernutrition. *Cell Metab* 2005; 1:371–378.
  201. Lecklin A, Dube MG, Torto RN, Kalra PS, Kalra SP. Perigestational suppression of weight gain with central leptin gene therapy results in lower weight F1 generation. *Peptides* 2005; 26:1176–1187.
